# Supplementary material
Source: HighWire-hosted journal article supplement (http://cmajopen.ca/highwire/filestream/80782/field_highwire_adjunct_files/1/open-2014-0008-reporting-checklist.pdf)
Supplement: open-2014-0008-reporting-checklist.pdf [file open-2014-0008-reporting-checklist.pdf]

## Consolidated criteria for reporting qualitative research (COREQ): a 32-item checklist for interviews and focus groups

### Submission to CMAJ Open

**Title:** Implementing A Provincial Take Home Naloxone Program: Quantitative and qualitative evidence from a cross-sectional study in British Columbia, Canada

**Authors:** Oluwajenyo Banjo<sup>1,2</sup>, MPHc, Despina Tzemis<sup>1</sup>, MPH, Diana Al-Qutub<sup>1,3</sup>, MPH, Ashraf Amlani<sup>1</sup>, MPH, Sarah Kesselring<sup>1,3</sup>, MPH, Jane A Buxton<sup>1,3</sup> MBBS MHSc

| No                                             | Item                                     | Guide questions/description                                                                                                                                     | Response                                                                                                                                                                                                                                                                                                                                                                               |
|------------------------------------------------|------------------------------------------|-----------------------------------------------------------------------------------------------------------------------------------------------------------------|----------------------------------------------------------------------------------------------------------------------------------------------------------------------------------------------------------------------------------------------------------------------------------------------------------------------------------------------------------------------------------------|
| <b>Domain 1: Research team and reflexivity</b> |                                          |                                                                                                                                                                 |                                                                                                                                                                                                                                                                                                                                                                                        |
| Personal Characteristics                       |                                          |                                                                                                                                                                 |                                                                                                                                                                                                                                                                                                                                                                                        |
| 1.                                             | Interviewer/facilitator                  | Which author/s conducted the interview or focus group?                                                                                                          | Despina Tzemis, MPH, Harm Reduction Epidemiologist<br>Diana Al-Qutub, MPH candidate, MPH practicum student                                                                                                                                                                                                                                                                             |
| 2.                                             | Credentials                              | What were the researcher's credentials? <i>E.g. PhD, MD</i>                                                                                                     | Sarah Kesselring, MPH candidate, MPH practicum student                                                                                                                                                                                                                                                                                                                                 |
| 3.                                             | Occupation                               | What was their occupation at the time of the study?                                                                                                             | Oluwajenyo Banjo, MPH candidate, MPH practicum student                                                                                                                                                                                                                                                                                                                                 |
| 4.                                             | Gender                                   | Was the researcher male or female?                                                                                                                              | All 4 researchers are female                                                                                                                                                                                                                                                                                                                                                           |
| 5.                                             | Experience and training                  | What experience or training did the researcher have?                                                                                                            | Despina Tzemis is a qualitative researcher and oversaw the MPH students. Students had completed coursework in qualitative methods and guidance was also provided by the principal investigator, Dr. Jane Buxton, who is a qualitative researcher.                                                                                                                                      |
| Relationship with participants                 |                                          |                                                                                                                                                                 |                                                                                                                                                                                                                                                                                                                                                                                        |
| 6.                                             | Relationship established                 | Was a relationship established prior to study commencement?                                                                                                     | The participants were not acquainted to the researchers prior to the study commencements                                                                                                                                                                                                                                                                                               |
| 7.                                             | Participant knowledge of the interviewer | What did the participants know about the researcher? <i>e.g. personal goals, reasons for doing the research</i>                                                 | The participants knew that the intent of the evaluation was to identify challenges or barriers encountered in order to make improvements to this new program. Interviewees knew that the researchers were affiliated with the BC Take Home Naloxone program. Participants were also made aware that the researchers were conducting this study as part of their MPH practicum project. |
| 8.                                             | Interviewer characteristics              | What characteristics were reported about the interviewer/facilitator? <i>e.g. Bias, assumptions, reasons and interests in the research topic</i>                |                                                                                                                                                                                                                                                                                                                                                                                        |
| <b>Domain 2: study design</b>                  |                                          |                                                                                                                                                                 |                                                                                                                                                                                                                                                                                                                                                                                        |
| Theoretical framework                          |                                          |                                                                                                                                                                 |                                                                                                                                                                                                                                                                                                                                                                                        |
| 9.                                             | Methodological orientation and Theory    | What methodological orientation was stated to underpin the study? <i>e.g. grounded theory, discourse analysis, ethnography, phenomenology, content analysis</i> | We used a qualitative descriptive approach (see reference 15 - Sandelowski M. Whatever happened to qualitative description? <i>Res Nurs Health</i> 2000; 23(4):334-340.)                                                                                                                                                                                                               |

## The BC Take Home Naloxone Program

| Participant selection |                              |                                                                                           |                                                                                                                                                                                                                                                                           |
|-----------------------|------------------------------|-------------------------------------------------------------------------------------------|---------------------------------------------------------------------------------------------------------------------------------------------------------------------------------------------------------------------------------------------------------------------------|
| 10.                   | Sampling                     | How were participants selected? <i>e.g. purposive, convenience, consecutive, snowball</i> | Participants were recruited through convenience sampling                                                                                                                                                                                                                  |
| 11.                   | Method of approach           | How were participants approached? <i>e.g. face-to-face, telephone, mail, email</i>        | Clients for focus groups (FG) and interviews were recruited by program staff at BCTHN sites. Participants for other stakeholder interviews (service providers, police and parents) were recruited via email                                                               |
| 12.                   | Sample size                  | How many participants were in the study?                                                  | 52 in total (40 clients and 12 service providers)                                                                                                                                                                                                                         |
| 13.                   | Non-participation            | How many people refused to participate or dropped out? Reasons?                           | We are not aware of any individuals that refused to participate in the study. No participants dropped out during the focus group on interview.                                                                                                                            |
| Setting               |                              |                                                                                           |                                                                                                                                                                                                                                                                           |
| 14.                   | Setting of data collection   | Where was the data collected? <i>e.g. home, clinic, workplace</i>                         | FG and interviews were conducted at BCTHN sites; Interviews for other stakeholders were conducted at a location that was convenient to the interviewee (coffee shop, telephone, BCCDC)                                                                                    |
| 15.                   | Presence of non-participants | Was anyone else present besides the participants and researchers?                         | No                                                                                                                                                                                                                                                                        |
| 16.                   | Description of sample        | What are the important characteristics of the sample? <i>e.g. demographic data, date</i>  | Age, gender, level of education and years of substance use are reported in Table 4 of the manuscript                                                                                                                                                                      |
| Data collection       |                              |                                                                                           |                                                                                                                                                                                                                                                                           |
| 17.                   | Interview guide              | Were questions, prompts, guides provided by the authors? Was it pilot tested?             | Following a literature review and input from members of the Community Advisory Board, a semi-structured interview guide was developed. The guides were modified slightly to cater to the stakeholder group being questioned. The guides were not tested in a pilot study. |
| 18.                   | Repeat interviews            | Were repeat interviews carried out? If yes, how many?                                     | No                                                                                                                                                                                                                                                                        |
| 19.                   | Audio/visual recording       | Did the research use audio or visual recording to collect the data?                       | The audio for all focus groups and interviews was recorded and transcribed prior to analysis. Researchers also took field notes during the focus groups to record any visual interactions that would not be captured through the audio recordings.                        |
| 20.                   | Field notes                  | Were field notes made during and/or after the interview or focus group?                   | Yes – during the focus groups                                                                                                                                                                                                                                             |
| 21.                   | Duration                     | What was the duration of the interviews or focus group?                                   | Focus groups: 1 hour approx.<br>Client interviews: 20 min approx.<br>Service provider Interviews: 1 hour approx.                                                                                                                                                          |
| 22.                   | Data saturation              | Was data saturation discussed?                                                            | Yes – data collection from clients & service providers ended when saturation was achieved                                                                                                                                                                                 |

## The BC Take Home Naloxone Program

|                                        |                                |                                                                                                                                          |                                                                                                                                                                                                                                                                                                         |
|----------------------------------------|--------------------------------|------------------------------------------------------------------------------------------------------------------------------------------|---------------------------------------------------------------------------------------------------------------------------------------------------------------------------------------------------------------------------------------------------------------------------------------------------------|
| 23.                                    | Transcripts returned           | Were transcripts returned to participants for comment and/or correction?                                                                 | No. Transcripts were reviewed by researchers who listened to the audio recordings to verify their accuracy.                                                                                                                                                                                             |
| <b>Domain 3: analysis and findings</b> |                                |                                                                                                                                          |                                                                                                                                                                                                                                                                                                         |
| Data analysis                          |                                |                                                                                                                                          |                                                                                                                                                                                                                                                                                                         |
| 24.                                    | Number of data coders          | How many data coders coded the data?                                                                                                     | 3 researchers (DA, OB, JB)                                                                                                                                                                                                                                                                              |
| 25.                                    | Description of the coding tree | Did authors provide a description of the coding tree?                                                                                    | No. However, initial coding was informed by the interview guides but codes were continually refined as simultaneous data collection & analysis provided new insights. Codes were grouped into similar descriptive categories. The final themes were agreed upon by the analysis team through consensus. |
| 26.                                    | Derivation of themes           | Were themes identified in advance or derived from the data?                                                                              |                                                                                                                                                                                                                                                                                                         |
| 27.                                    | Software                       | What software, if applicable, was used to manage the data?                                                                               | QSR NVivo version 8                                                                                                                                                                                                                                                                                     |
| 28.                                    | Participant checking           | Did participants provide feedback on the findings?                                                                                       | The results were shared with the Community Advisory Board to validate the findings.                                                                                                                                                                                                                     |
| Reporting                              |                                |                                                                                                                                          |                                                                                                                                                                                                                                                                                                         |
| 29.                                    | Quotations presented           | Were participant quotations presented to illustrate the themes / findings? Was each quotation identified? e.g. <i>participant number</i> | Yes – see table 5                                                                                                                                                                                                                                                                                       |
| 30.                                    | Data and findings consistent   | Was there consistency between the data presented and the findings?                                                                       | Yes                                                                                                                                                                                                                                                                                                     |
| 31.                                    | Clarity of major themes        | Were major themes clearly presented in the findings?                                                                                     | Yes                                                                                                                                                                                                                                                                                                     |
| 32.                                    | Clarity of minor themes        | Is there a description of diverse cases or discussion of minor themes?                                                                   | Yes                                                                                                                                                                                                                                                                                                     |
